# Supplementary material
Source: publisher figshare collection journal article supplement (https://diabetesjournals.figshare.com/articles/dataset/_/24319006)
Supplement: Supplementary file 3 [file 1]

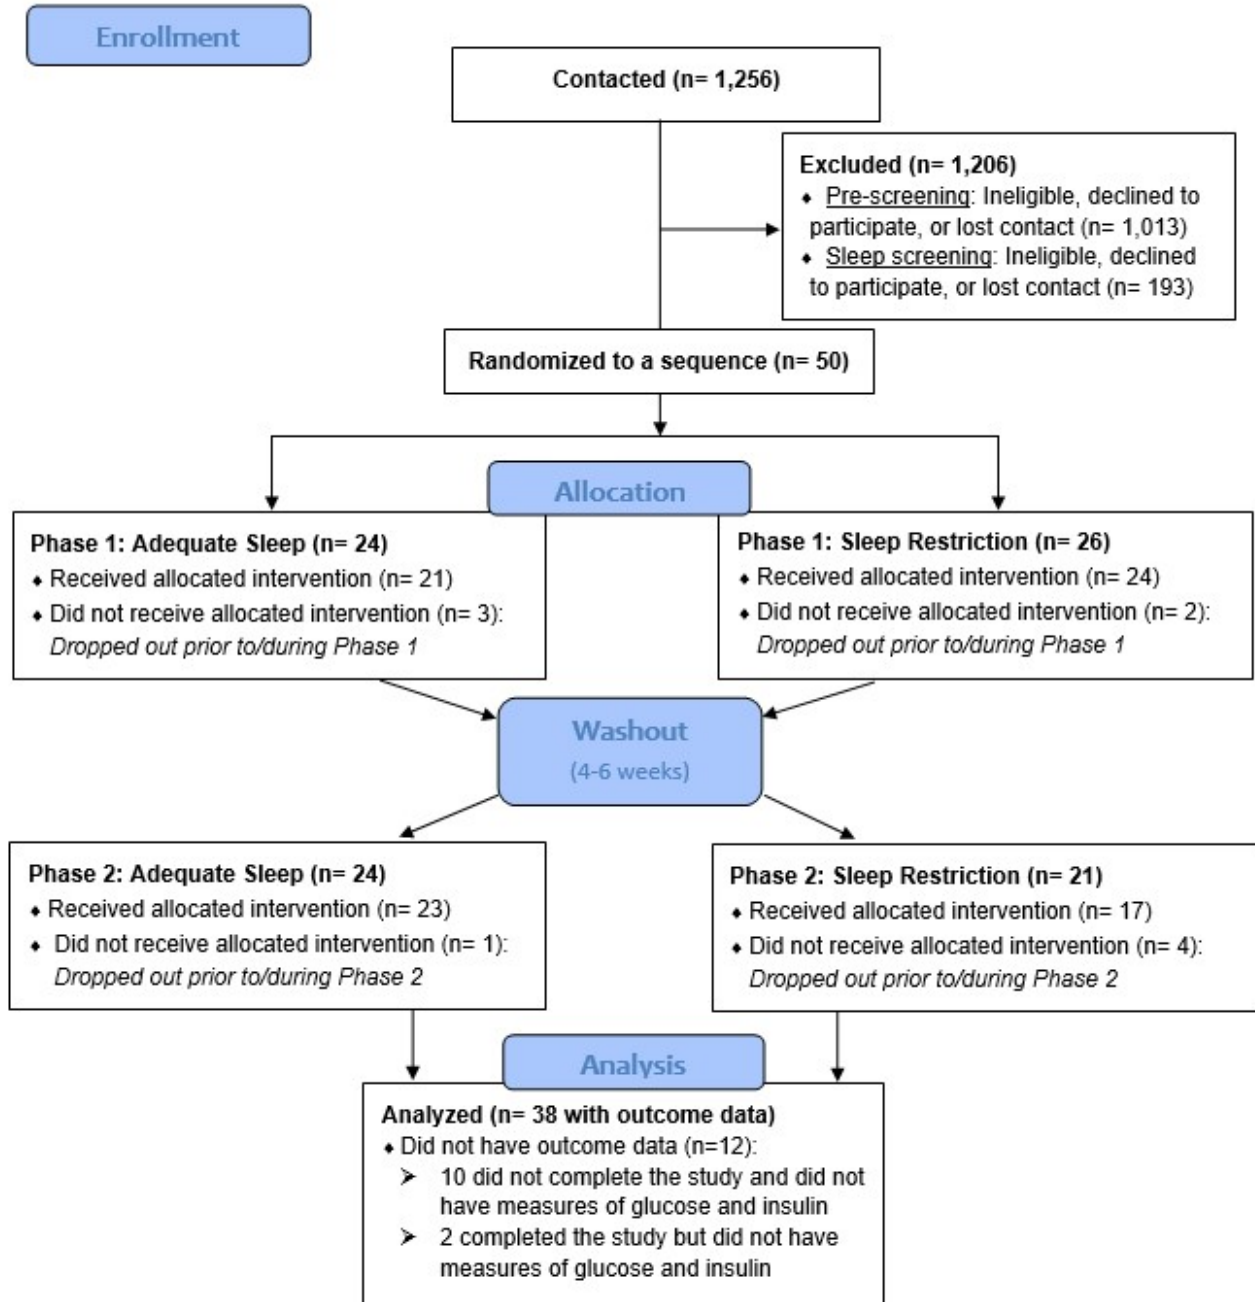

**Figure S1.** CONSORT flow diagram for this randomized crossover trial of the effects of mild SR on glucose metabolism in women.

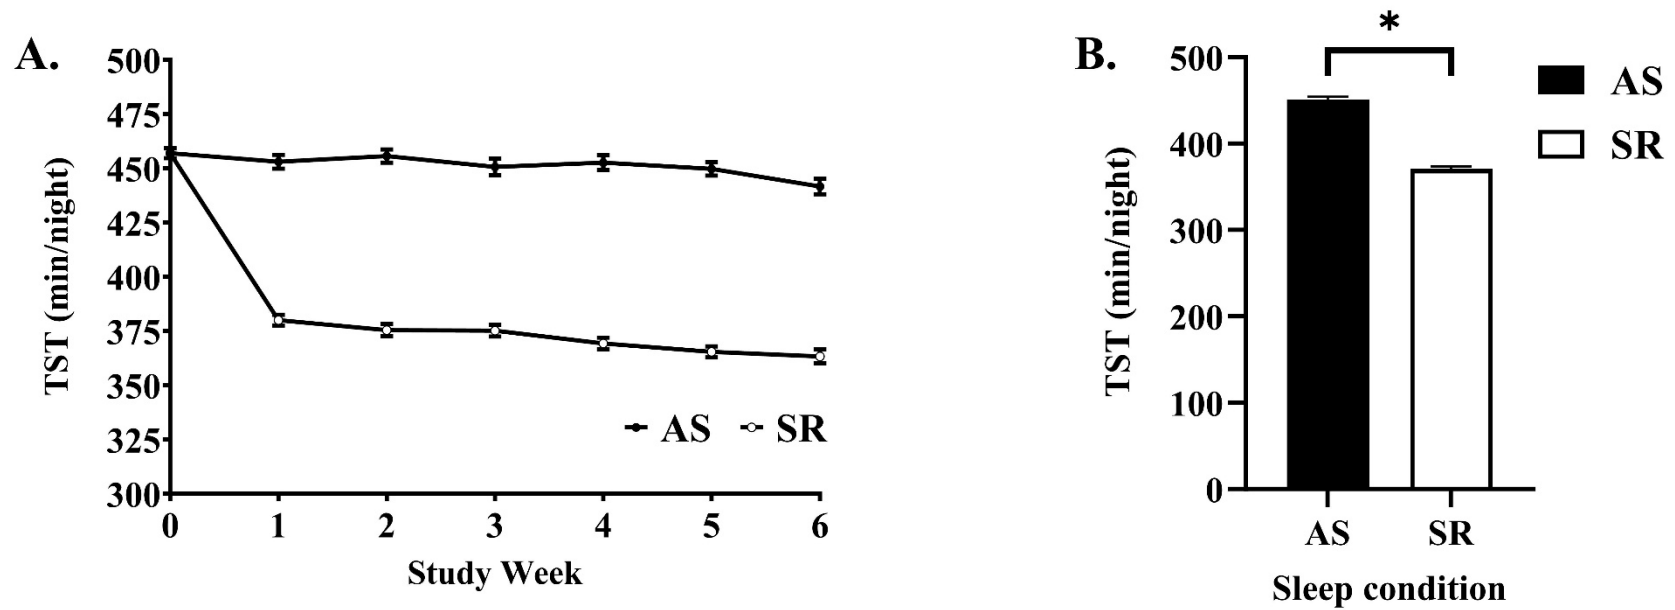

**Figure S2.** Nightly total sleep time (TST) among all women under conditions of adequate sleep (AS; black circles, bars) and mild sleep restriction (SR; white circles, bars). Panel A illustrates the mean $\pm$ SEM of TST across days at baseline and each study week, by condition. Panel B illustrates the least squared means $\pm$ SEM for the main effect of linear models adjusted for baseline values. Results show that baseline-adjusted total sleep time was significantly reduced in SR relative AS ( $\beta = -80.7 \pm 2.3$  min/night,  $p < 0.0001$ ).
